# Supplementary material for: LET-381/FoxF and its target UNC-30/Pitx2 specify and maintain the molecular identity of C. elegans mesodermal glia that regulate motor behavior
Source: PubMed Central journal article supplement (PMC10943081; doi:10.1038/s44318-024-00049-w), 2024-02-15
Supplement: 44318_2024_49_MOESM3_ESM.pdf [file 44318_2024_49_MOESM3_ESM.pdf]

## Appendix

### **LET-381/FoxF and its target UNC-30/Pitx2 specify and maintain the molecular identity of *C. elegans* mesodermal glia that regulate motor behavior**

**Authors:** Nikolaos Stefanakis, Jessica Jiang, Yupu Liang, Shai Shaham

\*Correspondence to [shaham@rockefeller.edu](mailto:shaham@rockefeller.edu)

#### **Table of Contents:**

|                    |       |
|--------------------|-------|
| Appendix Figure S1 | p. 2  |
| Appendix Figure S2 | p. 4  |
| Appendix Figure S3 | p. 6  |
| Appendix Figure S4 | p. 7  |
| Appendix Figure S5 | p. 8  |
| Appendix Table S1  | p. 11 |

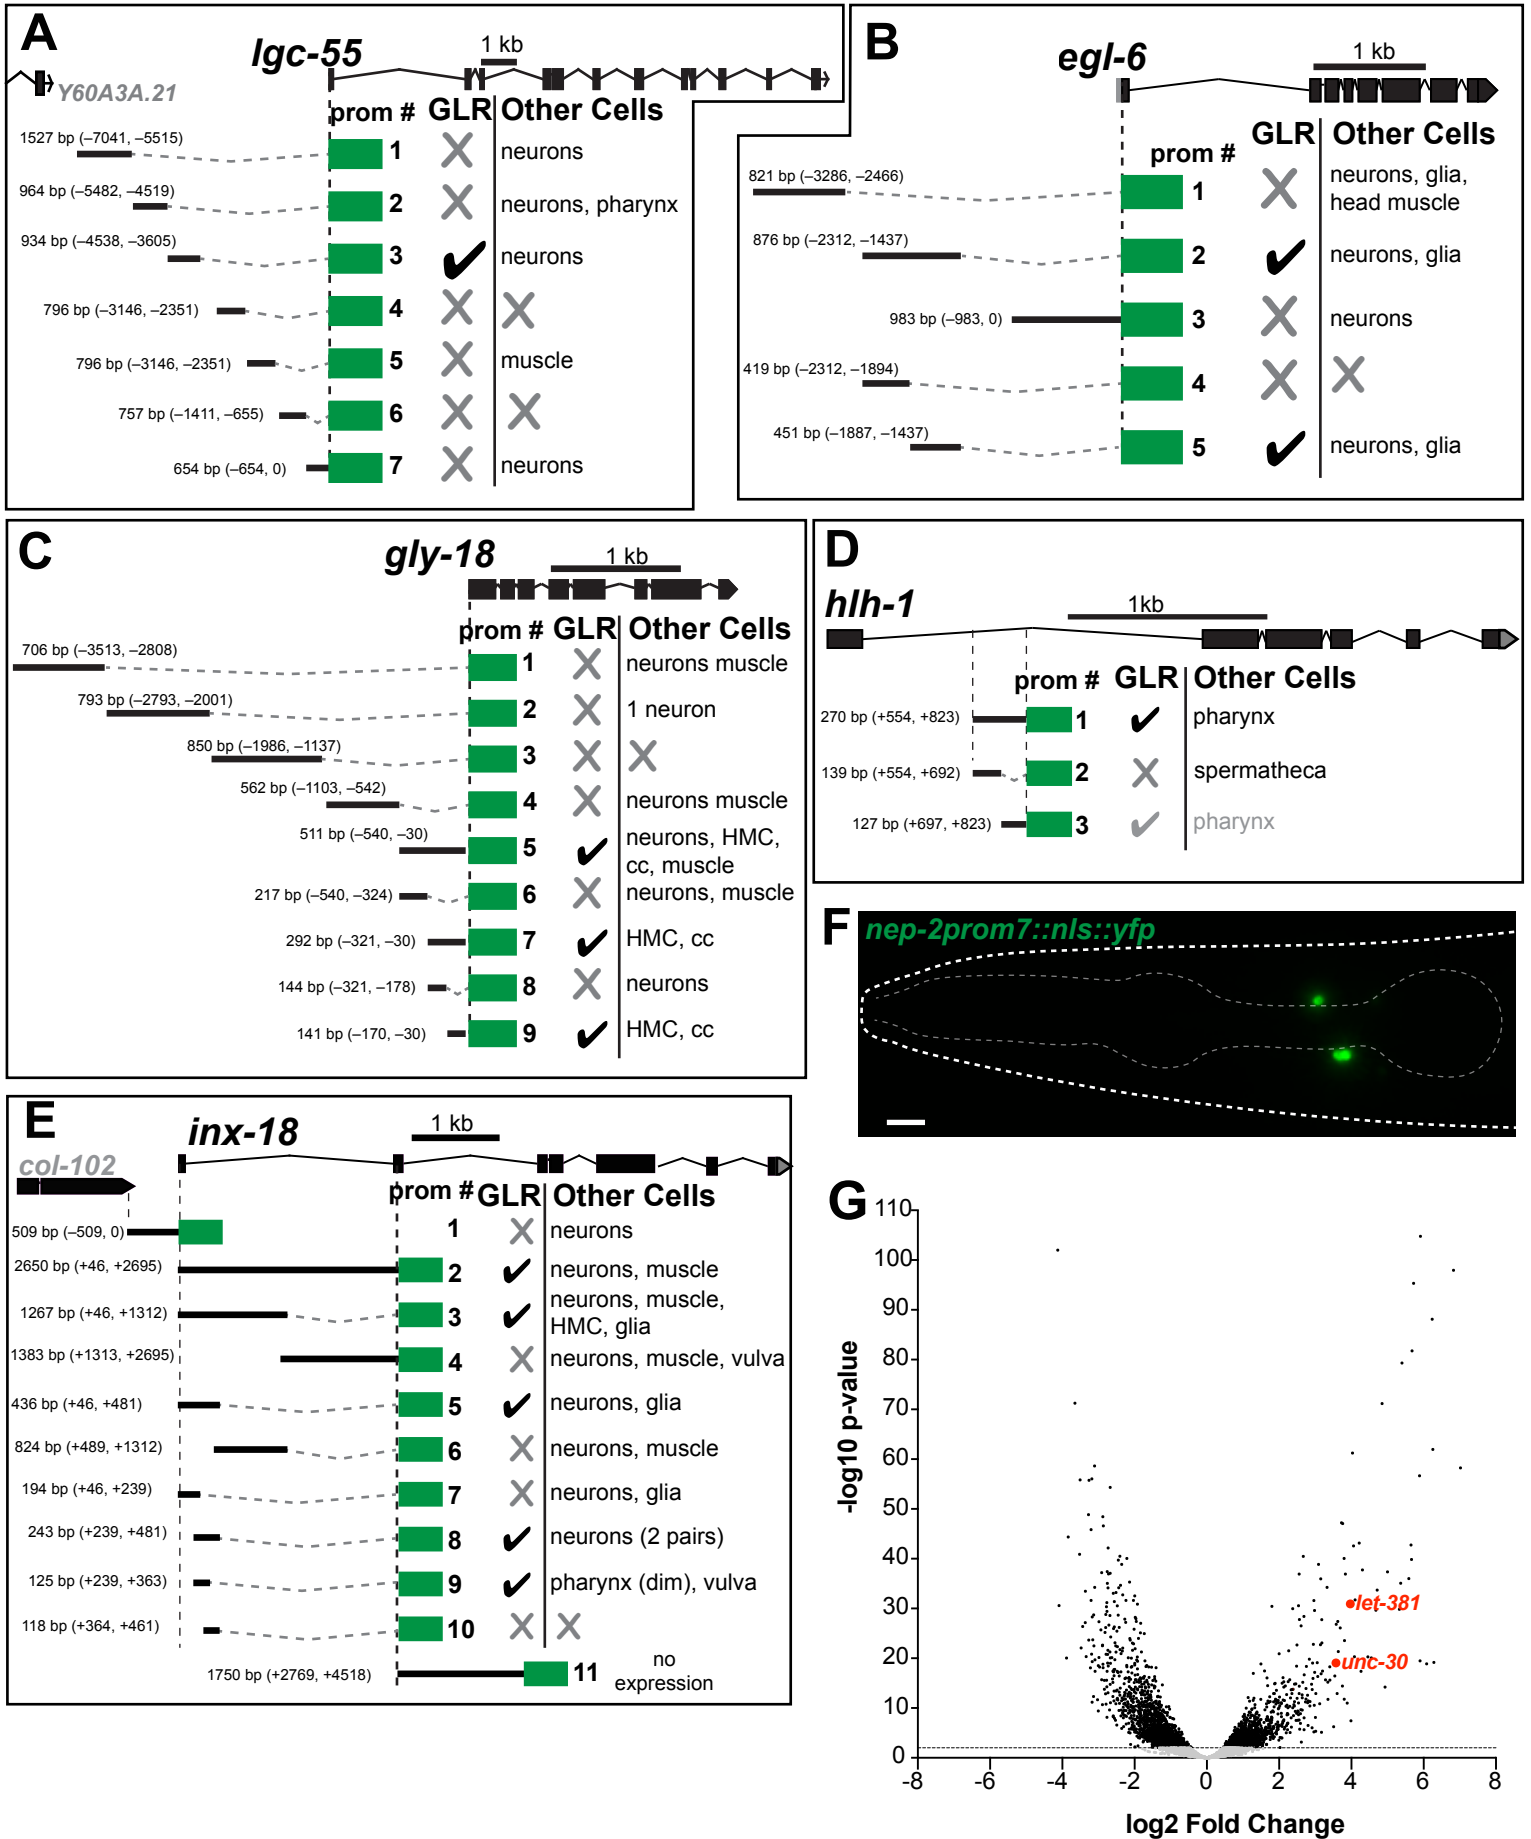

**Appendix Figure S1. Analysis of cis-regulatory regions of GLR glia-expressed genes.**

(A) – (E) Cis-regulatory dissection analysis for the genes *lgc-55* (A), *egl-6* (B), *gly-18* (C), *hlh-1* (F) and *inx-18* (E).

(F) A stable transgenic strain expressing nuclear YFP under the GLR glia-specific *nep-2prom7* was used to isolate GLR glia for the transcriptome analysis. Anterior is left, dorsal is up and scale bar is 10  $\mu$ m.

(G) Volcano plot show significantly enriched and depleted genes ( $p$ -value  $>0.05$ ) among all GLR glia expressed genes ( $>50$  reads). *let-381* and *unc-30*, the two transcription factor genes we found to have important roles in GLR glia development, are among the most highly enriched genes.

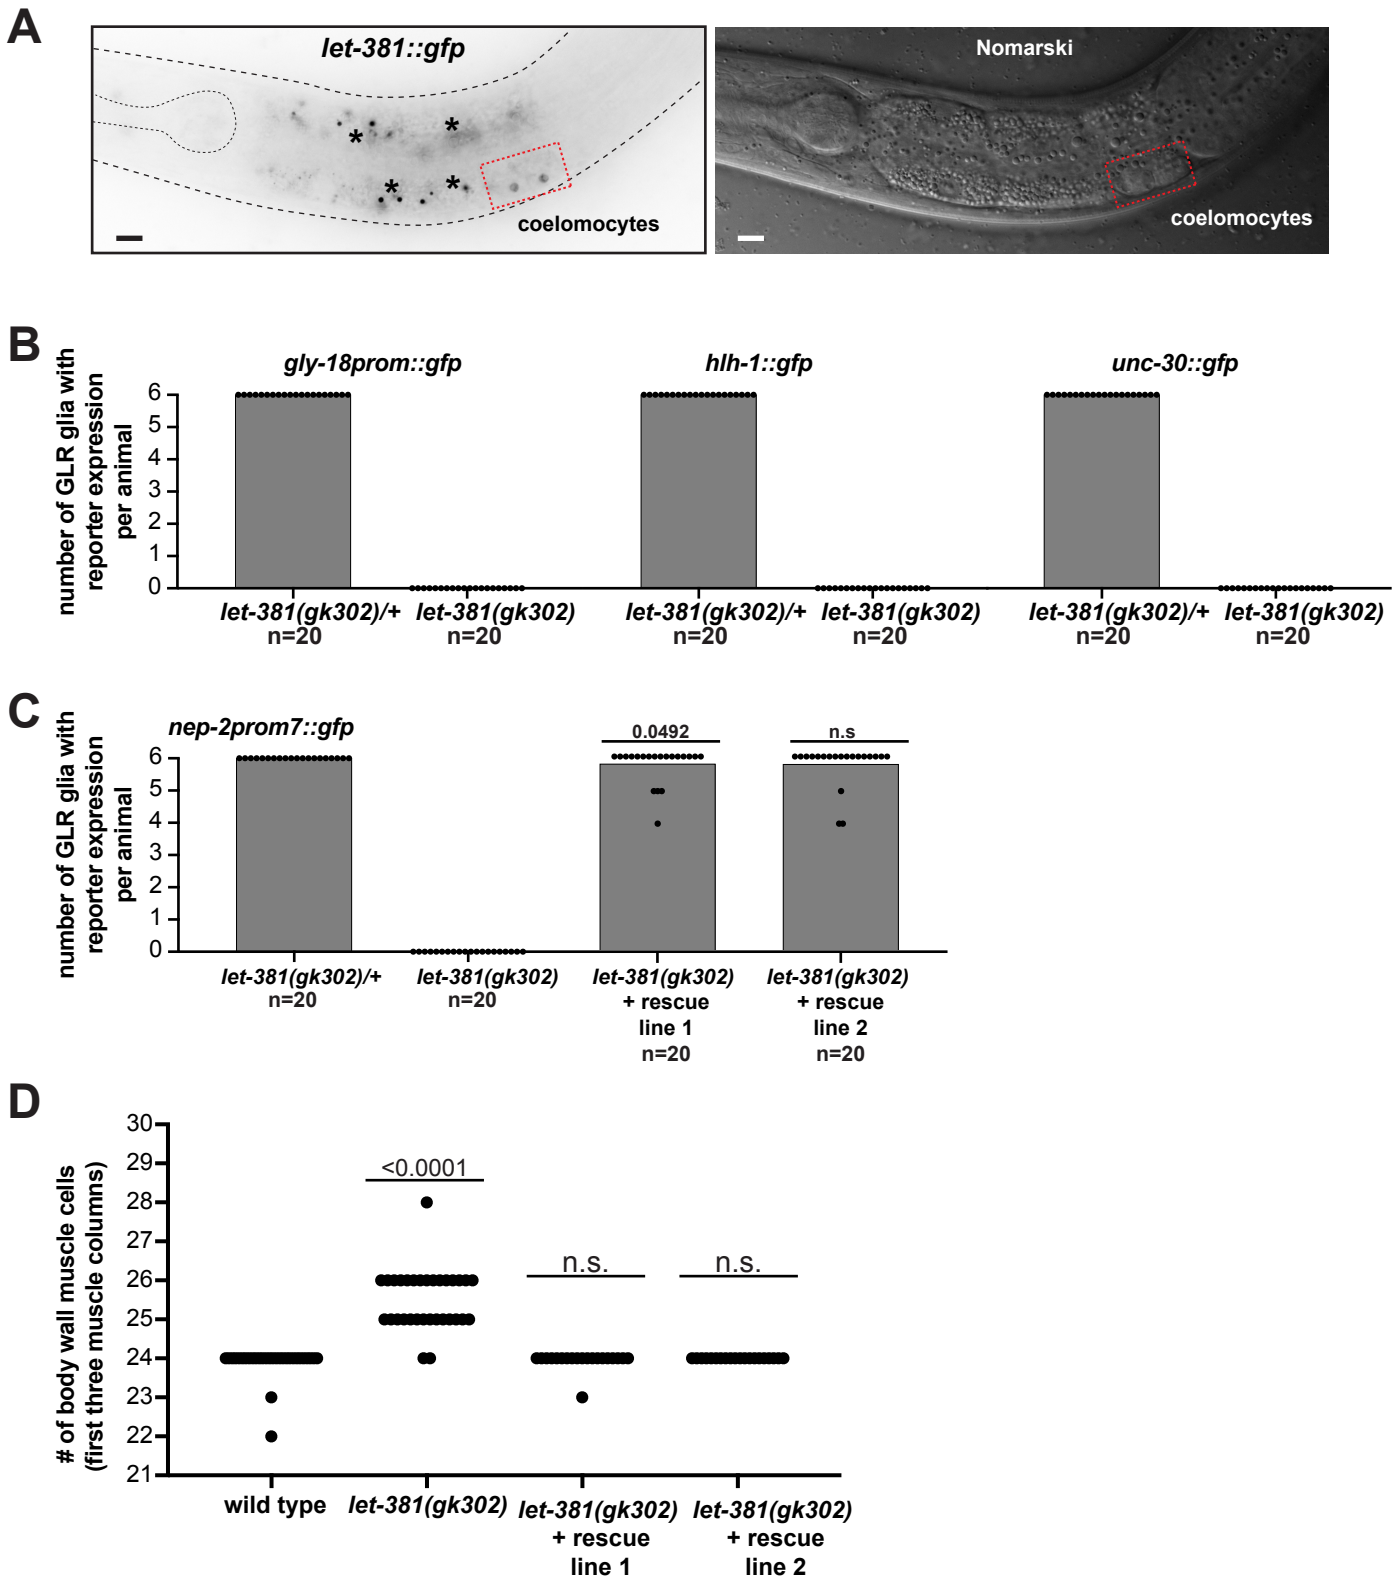



**Appendix Figure S2. *let-381/FoxF* is required for GLR glia fate specification.**

(A) *let-381::gfp* is expressed in the coelomocytes (red dashed box). Asterisks denote non-specific gut granule fluorescence. Nomarski image on the right panel.

(B) Number of GLR glia expressing *gly-18prom::gfp*, *hlh-1::gfp* and *unc-30::gfp* expression in wild type and homozygous *let-381(gk302)* mutants. Expression of all genes tested is absent from GLR cells in *let-381* homozygous null mutants.

(C), (D) Animals transgenic (2 independent lines) for the fosmid genomic clone WRM069bF08 carrying wild-type *let-381* have (B) 6 GLR glia and (C) no extra head muscle cells.

Data information: Anterior is left, dorsal is up and scale bars are 10µm for all animal images. Un-paired t-test used for statistical analysis in (B) and (C).

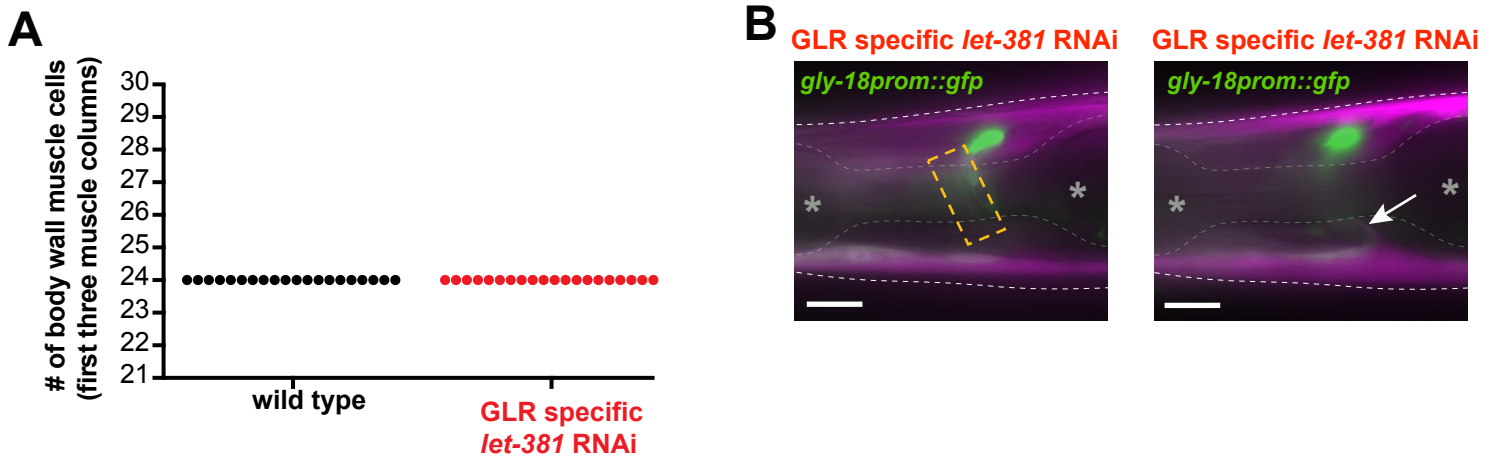

**Appendix Figure S3. Postembryonic *let-381* knockdown does not affect GLR fate specification.**

(A) Animals carrying the GLR glia-specific *let-381* RNAi arrays do not have extra head muscle cells.

(B) In addition, *let-381* RNAi does not cause anteriorly displaced Nerve Ring. Yellow dashed box outlines the Nerve Ring (green) on the left image and arrow on the right image shows a head muscle arm extending into the Nerve Ring. As evidenced, the Nerve Ring is located in its normal position between the two pharyngeal bulbs (grey asterisks).

Data information: Anterior is left, dorsal is up and scale bars are 10 $\mu$ m for all animal images.

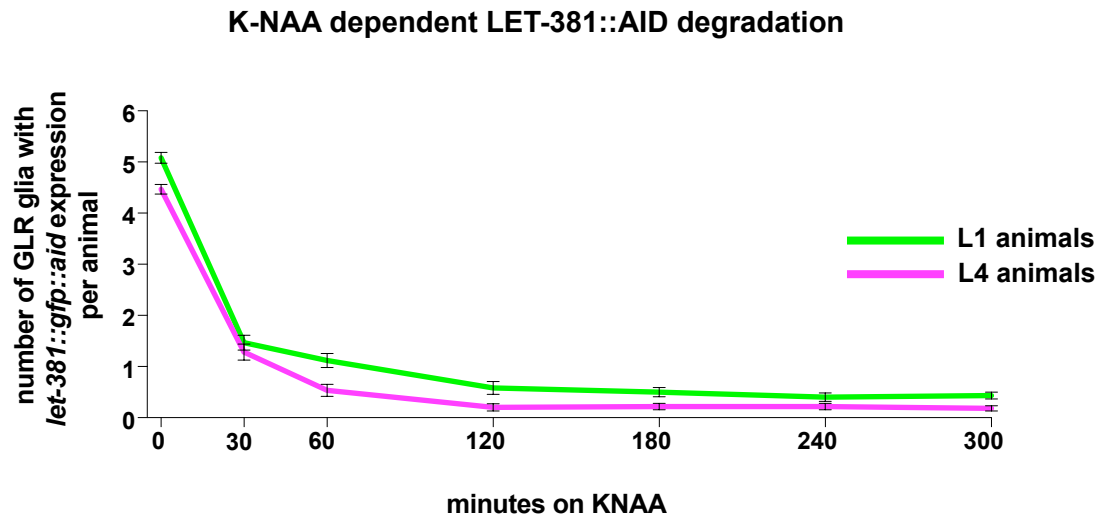

**Appendix Figure S4. LET-381::GFP::AID is rapidly degraded in the presence of the K-NAA auxin analog.**

Temporal analysis of *let-381::gfp::aid* degradation in presence of the auxin analog K-NAA. *let-381::gfp* expression is lost in GLR glia within 2 hours of exposure to K-NAA in both L1 and L4 stage animals.

Data information: n=60 for each time point. Error bars show standard error of the mean.

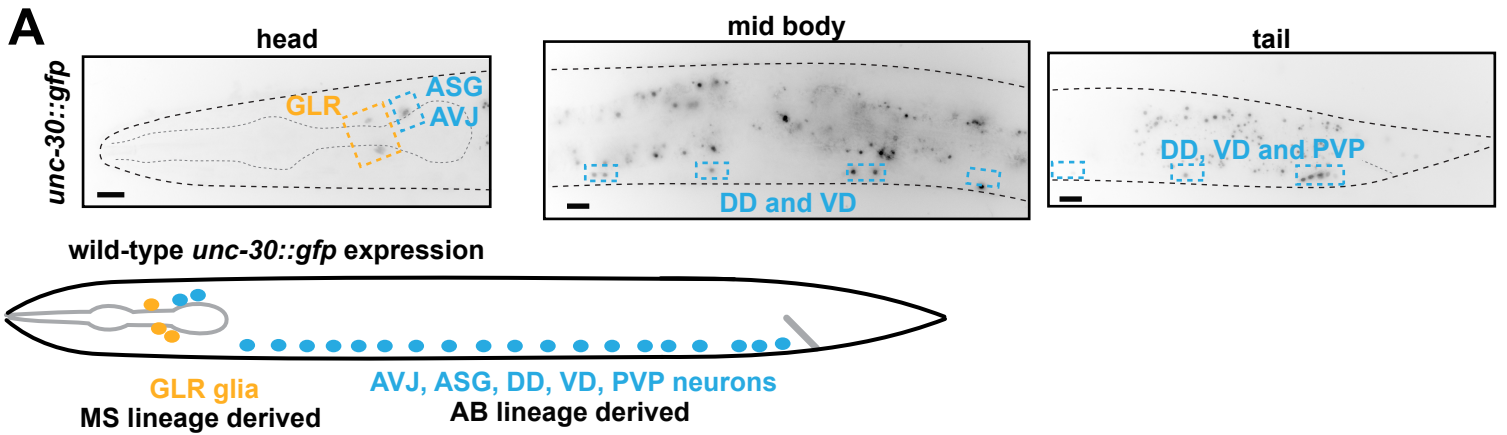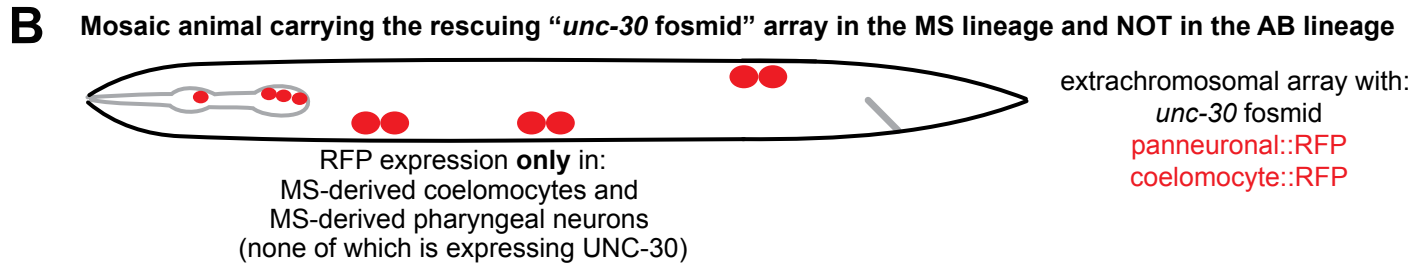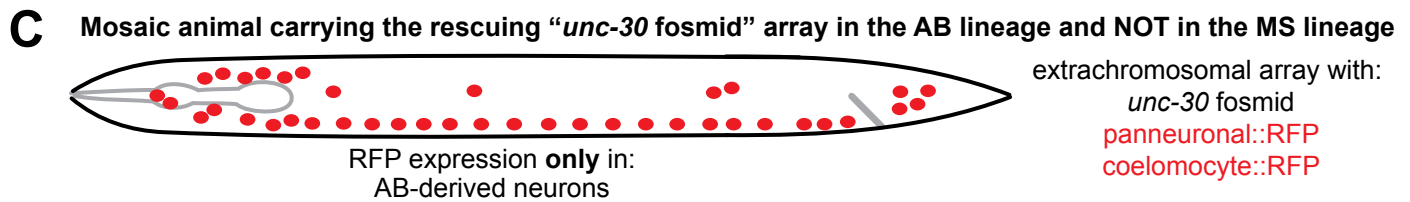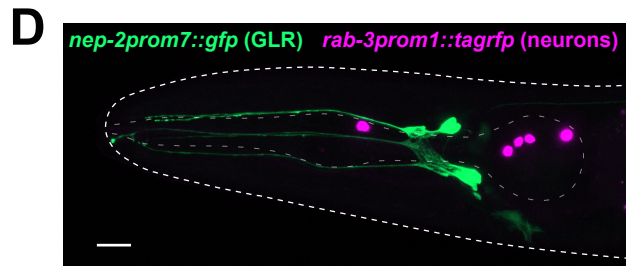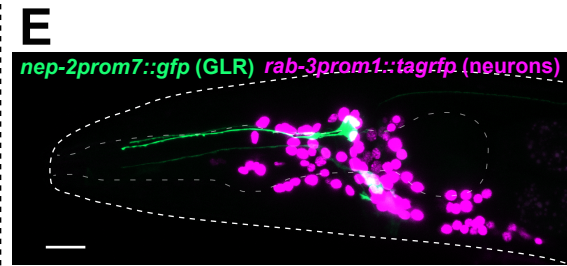

RESCUE

NO RESCUE

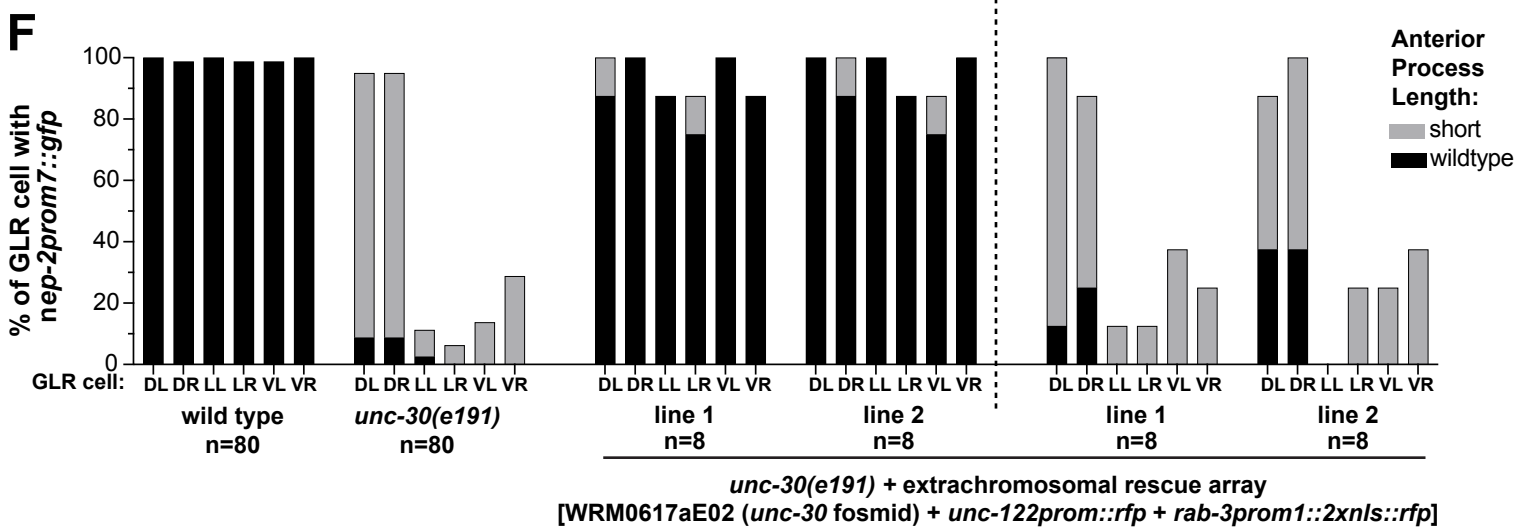

**Appendix Figure S5. UNC-30 acts cell autonomously to control GLR glia gene expression and morphology.**

(A) Fluorescence images (top) and schematic representation (bottom) of endogenous *unc-30::gfp* expression in wild-type animals. *unc-30::gfp* is expressed in the MS-lineage derived GLR glia (yellow dashed boxes), and in the ASG and AVJ head neurons, DD and VD Ventral Nerve Cord neurons and PVP neurons of the preanal ganglion, all deriving from the neuroectodermal-like lineage of the blast cell AB. We performed mosaic analysis to determine whether *unc-30* acts cell autonomously to control GLR glia gene expression and morphology. To this end we used unstable extrachromosomal arrays carrying a) wild type copies of the *unc-30* locus (*unc-30* fosmid WRM0617aE02) that can rescue the *unc-30(e191)* phenotype (Fig. EV3A) and b) *rfp* based panneuronal (*rab-3prom1::2xnl::tagrfp*) and coelomocyte (*unc-122prom::rfp*) transgenes to follow the array.

(B) Rare mosaic animals carrying the extrachromosomal array in the MS-lineage and NOT in the AB-lineage would express RFP only in the coelomocytes and the six MS-derived pharyngeal neurons I3, I4, I6, M1, M4 and M5, easily distinguished by their stereotypic position.

(C) Rare mosaic animals carrying the extrachromosomal array in the AB-lineage and NOT the MS lineage would have broad neuronal expression but no expression in the six MS-derived neurons mentioned above and no expression in coelomocytes.

(D) Fluorescence image of animal carrying the rescuing array in the MS lineage and not the AB lineage. RFP expression is in the MS-derived pharyngeal neurons M4, I4, I6, M1

and M5. GFP expression in GLR glia (green) shows rescue of the *unc-30(e191)* phenotypes.

(E) Fluorescence image of animal carrying the rescuing array in the AB lineage and not the MS lineage. RFP is broadly expressed in AB-derived neurons. GFP expression in GLR glia (green) does not show rescue of the *unc-30(e191)* phenotypes.

(F) Quantification of the mosaic rescue analysis. Presence of the array in the MS lineage and not the AB lineage is sufficient to rescue the *unc-30(e191)* null mutant phenotype on GLR gene expression and morphology.

Data information: Anterior is left, dorsal is up and scale bars are 10 $\mu$ m for all animal images.

Appendix Table S1. List of primers used in this study.

| TRANSGENIC REPORTERS MADE BY PCR FUSION |                       |                        |                                                                                                                                                                     |
|-----------------------------------------|-----------------------|------------------------|---------------------------------------------------------------------------------------------------------------------------------------------------------------------|
|                                         | primer C              | Primer D               | Primer D*                                                                                                                                                           |
| <i>gfp/rfp</i> amplicon                 | agcttgcatgcctgcaggtcg | aagggcccgtacggccgacta  | caagaaaaacgccgtcctcg                                                                                                                                                |
|                                         | <b>Primer A</b>       | <b>Primer A*</b>       | <b>Primer B:</b><br>B primers start with CTCTAGAGTCGACCTGCAGGCATGCAAGC (homology with <i>gfp/rfp</i> amplicon), followed by the gene specific sequence listed below |
| <i>nep-2 prom1</i>                      | ggacgatgctcttcgcaaag  | gctcttcgcaaagtggctcc   | atcgggaggcgctccgaccgt                                                                                                                                               |
| <i>nep-2 prom2</i>                      | gacgtcagcgcgttctaac   | cagcgcgttctaaccatgc    | atcgggaggcgctccgaccgt                                                                                                                                               |
| <i>nep-2 prom3</i>                      | ggacgatgctcttcgcaaag  | gctcttcgcaaagtggctcc   | gtagatcaaaccgtaatggg                                                                                                                                                |
| <i>nep-2 prom4</i>                      | ggacgatgctcttcgcaaag  | gctcttcgcaaagtggctcc   | cggagtcagaagtatacaa                                                                                                                                                 |
| <i>nep-2 prom5</i>                      | gactccgcccattccgattc  | cccattccgattcccacttg   | gtagatcaaaccgtaatggg                                                                                                                                                |
| <i>nep-2 prom6</i>                      | cgacctcatcatatttaagtg | cgacctcatcatatttaagtg  | gtagatcaaaccgtaatggg                                                                                                                                                |
| <i>nep-2 prom7</i>                      | gactccgcccattccgattc  | cccattccgattcccacttg   | ctaaaatatgatgaggctcg                                                                                                                                                |
| <i>lgc-55 prom1</i>                     | ccagcctaactgctccggt   | ccatgccaattagcgcac     | ggctataacaaggggtgctg                                                                                                                                                |
| <i>lgc-55 prom2</i>                     | cataggcgtgtttaaagca   | gcgctactccacctgaaga    | ggcgtaggctttggcattgg                                                                                                                                                |
| <i>lgc-55 prom3</i>                     | ccaatgccaaagcctacgcc  | gcctaagcctaagcctaagt   | ccaccagactcttcaatg                                                                                                                                                  |
| <i>lgc-55 prom4</i>                     | cctggtgggtactataaagc  | gggtactataaagcggggca   | gtaggcgcaaacgcttgc                                                                                                                                                  |
| <i>lgc-55 prom5</i>                     | ctacgtgtagcccaaaaca   | gttagtgggtactgtgcacaag | cctctcatctccgagagac                                                                                                                                                 |
| <i>lgc-55 prom6</i>                     | gcaccacctcaagatttatc  | cattggttcgctctgtttg    | cgccacgaaaaactgttga                                                                                                                                                 |
| <i>lgc-55 prom7</i>                     | caacaagttttcgtggcg    | ggacccaaaattctctacc    | ccatttcatttcgacatcta                                                                                                                                                |
| <i>egl-6 prom1</i>                      | ccgcaatttttgggtggg    | gaacatttcaccggaatctc   | agccgagtaaagtctaag                                                                                                                                                  |
| <i>egl-6 prom2</i>                      | cctagtgtgctgcttcc     | cttcttccaggaatttcg     | cagcttctatgttgcacg                                                                                                                                                  |
| <i>egl-6 prom3</i>                      | cagctgaattgagctaccac  | cgtttctgtcgttttgctc    | tgctgaaaagctgctattgt                                                                                                                                                |
| <i>egl-6 prom4</i>                      | cctagtgtgctgcttcc     | cttcttccaggaatttcg     | gaaaccttctggtctcacac                                                                                                                                                |
| <i>egl-6 prom5</i>                      | ggtttcaagtagagctact   | gagctactacttctattcc    | cagcttctatgttgcacg                                                                                                                                                  |
| <i>gly-18 prom1</i>                     | cttgcaaacatgctaactg   | gagccaactagctgttctt    | gaagtcgagggaagctacta                                                                                                                                                |
| <i>gly-18 prom2</i>                     | ctaagtagcttccgcgacttc | cttactacctacagtgtcc    | cacagttacaagggtcaccc                                                                                                                                                |
| <i>gly-18 prom3</i>                     | ggtgcacctgtaactgtgt   | ctcgtagctgttgaacgag    | ctataactaatgccaatattg                                                                                                                                               |
| <i>gly-18 prom4</i>                     | gccactccactatatttcg   | ctgtgttcacacaatgactgc  | caatactttgacagctgtct                                                                                                                                                |
| <i>gly-18 prom5</i>                     | gagacagctgtcaaagtattg | gtatcactgtgaaaagccc    | cttgatacgttttaacacag                                                                                                                                                |
| <i>gly-18 prom6</i>                     | gagacagctgtcaaagtattg | gtatcactgtgaaaagccc    | agacatgagagaaattcagg                                                                                                                                                |
| <i>gly-18 prom7</i>                     | ctcatgtctaaccctgtgg   | ccctgtggaattttgtcaa    | cttgatacgttttaacacag                                                                                                                                                |
| <i>gly-18 prom8</i>                     | ctcatgtctaaccctgtgg   | ccctgtggaattttgtcaa    | gaattattggaaaactggga                                                                                                                                                |
| <i>gly-18 prom9</i>                     | caattgaagaactccgcgac  | caattgaagaactccgcgac   | cttgatacgttttaacacag                                                                                                                                                |
| <i>hlh-1 prom1</i>                      | ggttataatgagcaccagatg | ggttataatgagcaccagatg  | caacgggtaaccagctcta                                                                                                                                                 |
| <i>hlh-1 prom2</i>                      | ggttataatgagcaccagatg | ggttataatgagcaccagatg  | cataaattctcttctcccct                                                                                                                                                |
| <i>hlh-1 prom3</i>                      | gaaatgggtcatgggaatag  | gggtcatgggaatagtaaag   | caacgggtaaccagctcta                                                                                                                                                 |
| <i>inx-18 prom1</i>                     | ggagaagcttcccagccta   | caaccggacagagcagctac   | tcggaacgtcttcaggcttc                                                                                                                                                |
| <i>inx-18 prom2</i>                     | ggaatgcactttctggcctc  | ctaaggttcttgaaccaag    | cgtcaactctggaaattttc                                                                                                                                                |
| <i>inx-18 prom3</i>                     | ggaatgcactttctggcctc  | ctaaggttcttgaaccaag    | ccgtatacacattacatgtg                                                                                                                                                |
| <i>inx-18 prom4</i>                     | cacatgtaatgtgtatcgg   | ggagagcactcatatcatct   | cgtcaactctggaaattttc                                                                                                                                                |

|                        |                       |                       |                       |
|------------------------|-----------------------|-----------------------|-----------------------|
| <i>inx-18 prom5</i>    | ggaatgcactttctggcctc  | ctaaggtttctgaaccaag   | ctacaaggcggcctactttg  |
| <i>inx-18 prom6</i>    | gcacgcaggcagacatgttc  | ggcagacatgttcgtacctg  | ccgtatacacattacatgtg  |
| <i>inx-18 prom7</i>    | ggaatgcactttctggcctc  | ctaaggtttctgaaccaag   | cttgaataggagatggaac   |
| <i>inx-18 prom8</i>    | gtcccacattacactttcgc  | gtcccacattacactttcgc  | ctacaaggcggcctactttg  |
| <i>inx-18 prom9</i>    | gtcccacattacactttcgc  | gtcccacattacactttcgc  | tttattagtattgatggtc   |
| <i>inx-18 prom10</i>   | gtaaacataatgcgattgtag | gtaaacataatgcgattgtag | ctacaaggcggcctactttg  |
| <i>inx-18 prom11</i>   | catgtttgctgttttggtgc  | caaacaatatggttcgtagg  | ccattgccctggtaaattgt  |
| <i>unc-30 prom1</i>    | cgctccaactgtgttctgt   | tctgtgtcttttacctacg   | caaaagctgcaagatcttgg  |
| <i>unc-30 prom2</i>    | ccaagatcttgcagcttttg  | gaaagtcttctggcgacatg  | ctgttttgagttacagcc    |
| <i>unc-30 prom3</i>    | cgatagaagtgagcttggtc  | ccaaaacaagggtgtctgac  | gaacgctctttccagtttc   |
| <i>unc-30 prom4</i>    | ctgctgaaaacttagttatg  | catatgcagagagaggcttag | cactgggtgtaacttctca   |
| <i>unc-30 prom5</i>    | tgagaagttacaccaagtg   | ggaacacggtgaccgtgaga  | cccttatcatcaccagatgt  |
| <i>unc-30 prom6</i>    | gtaaacagtttgcgcaattgc | ggatgatgataagggtagatg | gtgtgatctttgccggag    |
| <i>unc-30 prom7</i>    | cggccacactgactgctatac | gcagcagtcgcataatcggt  | ctgaaataaaagaaatggaag |
| <i>unc-30 prom8</i>    | gcagtcaggtgaagcagaagg | gtaagcagaaggcaggcatc  | gagtcgtctagctgaaaatgg |
| <i>unc-30 prom9</i>    | ctagtcgattttcagctgct  | ccaacgtgagttttacggat  | ccacaggatgctgtcaaacc  |
| <i>unc-30 prom10</i>   | ggtttgacagcatcctgtgg  | ggtttctctactccaatcc   | gaatgcagcttgggctctgg  |
| <i>pll-1 prom1</i>     | cttgtctgcgtgcagtaattc | acaattgcccggcttgccga  | cacattgtgtttggtttcc   |
| <i>hot-5 prom2</i>     | gacacactactggcgttact  | cgaagtacaagttaagcttc  | ctgacggaaactcttactca  |
| <i>glb-26 prom1</i>    | gactgtggagacgatcgtac  | gttcgaagatctgcacgaag  | ctgggaatgagcacacgaaa  |
| <i>T28A11.3 prom1</i>  | ctatcaaatgggttctctc   | cgttggactctacaccgaga  | ctgacagaaaagaataggg   |
| <i>F28H7.2 prom1</i>   | gcgatatattcccacctctg  | gctccagaacgagacattg   | cgaatcaaatagttgacgag  |
| <i>ZC317.2 prom1</i>   | ctccactggatgggttacgc  | cagtggaagctccagcttc   | ctggaaaatcatttgatagg  |
| <i>F35D2.3 prom1</i>   | cgctctcccgaattccaga   | cctgagatgcaccgtatgtc  | ctgtaagaagccgccattag  |
| <i>F13D12.10 prom1</i> | cccattttcagaacgatctag | gaaaaccgtcgacctgggtc  | tgtagctgctcgtgttcggc  |
| <i>mnp-1 prom3</i>     | cgatccatgtgtgtaactg   | gtgagcttctactacaatca  | acgcagatggtttcgctg    |
| <i>ncam-1 prom2</i>    | ggttttacggcggcatatgt  | gcggcatatgttattctagc  | caaacacatgctcttcgcat  |
| <i>unc-54 prom3</i>    | cgactccaaagtaggtagt   | gagacatgtttcatctgaag  | cgcttcttcaaattggtttc  |
| <i>F41G4.8 prom1</i>   | gacatgtgaacttaggtttcc | gatcctgatttccgctccaa  | gtgaactcaactcaaactttg |



|                      |                               |                               |                               |
|----------------------|-------------------------------|-------------------------------|-------------------------------|
| <i>F41G4.8 prom2</i> | <i>gagatcgattagacacagtg</i>   | <i>ggtaagaaaagggtttcgag</i>   | <i>ccagccgctgcaatactgag</i>   |
| <i>twk-4 prom1</i>   | <i>ctcaccactaggatctgttag</i>  | <i>gagacatactttcctgttcgg</i>  | <i>ccgcctatatcttggttttc</i>   |
| <i>twk-4 prom2</i>   | <i>gaaagtataggtgagggagg</i>   | <i>ctgagggcaaggaggagaag</i>   | <i>caggtcgaagtattttacagg</i>  |
| <i>twk-4 prom3</i>   | <i>ccgaagagaaaagggttcaatc</i> | <i>gtttgtgaatccaagtgc</i>     | <i>gggtagcagtagaatggggg</i>   |
| <i>ocr-1 prom1</i>   | <i>gcgttgacagcaactttcgg</i>   | <i>gcatggacaagtcaaaggg</i>    | <i>cgttctggacggttgccttccc</i> |
| <i>ocr-1 prom2</i>   | <i>ctgcagtttcacgacacaac</i>   | <i>ggatctccatgaacacccttc</i>  | <i>cagattctcggattgtctttc</i>  |
| <i>ocr-1 prom3</i>   | <i>gagagtgagaggattttccg</i>   | <i>ccacgaactgatgaatgac</i>    | <i>caacgctccataccatttctc</i>  |
| <i>twk-9 prom1</i>   | <i>cattcacatgttttgcaag</i>    | <i>ggcagttcatattttggagg</i>   | <i>cgggaatgtggaagctgca</i>    |
| <i>mig-6 prom1</i>   | <i>cagatgacttcccagtttc</i>    | <i>gctatcttccgtaaatac</i>     | <i>cagaaactttttgtgtgag</i>    |
| <i>mig-6 prom2</i>   | <i>gaaatctgatccgccgtggtc</i>  | <i>ctttccgaatgtgttccgg</i>    | <i>gaagatctagatgatctcac</i>   |
| <i>mig-6 prom3</i>   | <i>gaaccgaactcgcgcttttc</i>   | <i>ctgctctcttttaactctc</i>    | <i>gaatggcgcacactttggctc</i>  |
| <i>mig-6 prom4</i>   | <i>ctgctggagatcaaggacagc</i>  | <i>gcagacttgaatcggttaag</i>   | <i>cacttctctgagcaagccgac</i>  |
| <i>mig-6 prom5</i>   | <i>gttcacatttatctccagtc</i>   | <i>gaatacgcgacgcgctc</i>      | <i>ctcattgataccctttcaag</i>   |
| <i>mig-17 prom1</i>  | <i>gaggcttcttctacaacac</i>    | <i>gtggagagaatggatgggggtg</i> | <i>cccctctctgaccatggctc</i>   |
| <i>mig-17 prom2</i>  | <i>gaggaaagttcaggatggac</i>   | <i>gctcagtagaagcttagtgg</i>   | <i>gacatttttcggtcgatttcc</i>  |
| <i>mig-17 prom3</i>  | <i>gctcagtagaagcttagtgg</i>   | <i>ggaaatcgaccgaaaaatgctc</i> | <i>ctcctaacagcccaaaaaag</i>   |
| <i>let-2 prom1</i>   | <i>caatagttacggggcacacc</i>   | <i>ggtggcatgaagaatgattg</i>   | <i>gaaaacttcttgacttgac</i>    |
| <i>let-2 prom2</i>   | <i>ccctactctctatgtttgc</i>    | <i>gcactttgtcaacacgaaag</i>   | <i>gatgaatcgcacatatgtggc</i>  |
| <i>let-2 prom3</i>   | <i>gaaggttgacattcctaggc</i>   | <i>ctgaactttgacctttcag</i>    | <i>ggtcagtagattgatcgggtg</i>  |
| <i>let-2 prom4</i>   | <i>gcctaaaaagtgaaacgtttg</i>  | <i>catgcagagattgctctaacc</i>  | <i>gatattggggagagagttaac</i>  |
| <i>let-2 prom5</i>   | <i>gaatcaagggagatcgtgga</i>   | <i>ggttgaacggaaactgacgg</i>   | <i>ctagacttccctatcacaaac</i>  |
| <i>acc-2 prom1</i>   | <i>ccatactttggcccaccctg</i>   | <i>gctttggtgttagcctattc</i>   | <i>cgaagaaaaggaatgtgcag</i>   |
| <i>oac-7 prom1</i>   | <i>ggacgtcaagaaagccattg</i>   | <i>caagaagtaccaaactgagg</i>   | <i>catttgaatatccgtggcgg</i>   |
| <i>kvs-5 prom1</i>   | <i>cctcatccttctatgcttg</i>    | <i>cgggttcttctgcaaaaac</i>    | <i>cttctacgcgcctacctaac</i>   |
| <i>kvs-5 prom2</i>   | <i>gtaatataggaacggcatctc</i>  | <i>gaagaaacgcctctgttttc</i>   | <i>ccgcaaagatcaaaacttcac</i>  |
| <i>lbp-1 prom1</i>   | <i>gtcatggtgtgacttcgctc</i>   | <i>caatggaatcacgtgccctc</i>   | <i>ggcagagcaagtctaaaggg</i>   |
| <i>lbp-1 prom2</i>   | <i>cgctttgcaagtttcaag</i>     | <i>gagacgccaaggaagagacc</i>   | <i>ggagtcgttgtagaatcgcc</i>   |
| <i>adt-3 prom1</i>   | <i>cgccaccaatgccacatgctc</i>  | <i>ccaagtttagcccccttcc</i>    | <i>ggacaaattcagtaggacatc</i>  |
| <i>R03E9.2 prom1</i> | <i>gaaatgaaaggaatacccg g</i>  | <i>cgaaaatgcgaatgtgcagac</i>  | <i>ccagggcctaattttcatacc</i>  |
| <i>R03E9.2 prom2</i> | <i>ccgtcagttttgcaatggtc</i>   | <i>gatatgatgttttcggttcc</i>   | <i>tacaggaagctttctagaag</i>   |
| <i>R03E9.2 prom3</i> | <i>gaaacgtgacgcaatctcatc</i>  | <i>gtgtgtgggtgtgtgacac</i>    | <i>ggaaaacagccagctacacc</i>   |
| <i>R03E9.2 prom4</i> | <i>gccaatattgcaagaatcgg</i>   | <i>gtgacagtaaatacaaggag</i>   | <i>cgtgcgcgtaagatatgacg</i>   |
| <i>F49B2.6 prom1</i> | <i>gagactctttacaccacgtg</i>   | <i>cgctccattgagaaattgtag</i>  | <i>ctctatatgcaaatgcgctc</i>   |
| <i>F49B2.6 prom2</i> | <i>cttcttcttctgtctgtgtg</i>   | <i>gtgctttacccccaaaaaatg</i>  | <i>ggactctaagtagcaagggg</i>   |
| <i>nta-1 prom1</i>   | <i>cccaactcctgactctaaaag</i>  | <i>caattgtttgtgatttcccc</i>   | <i>cgttgacttttccatttccc</i>   |
| <i>nta-1 prom2</i>   | <i>gccctgtcacaggtaaattg</i>   | <i>cgcaagttagtcaagatatg</i>   | <i>cccgggtgatggttacctttg</i>  |
| <i>T14B4.9 prom1</i> | <i>cgatcttttccatgattgc</i>    | <i>attagcatggtttccctcag</i>   | <i>ctttgattatgacggacatgc</i>  |

|                               |                                                                             |                                                                                 |                              |
|-------------------------------|-----------------------------------------------------------------------------|---------------------------------------------------------------------------------|------------------------------|
| <i>T14B4.9 prom2</i>          | cggaggggaagtaaaatctta                                                       | cgatttactggaactacca                                                             | gtacagtcataatttacagatgg      |
| <i>T14B4.9 prom3</i>          | ggcacctagaataacaatgag                                                       | ggagacgcaaagagacagct<br>c                                                       | ctccaaatttgagctcagggg        |
| <i>tbc-12 prom1</i>           | cctgcagctcgTTTTTTTg                                                         | gtcgtgtctactccattttg                                                            | <i>gagcaaaaagagagaaactc</i>  |
| <i>tbc-12 prom2</i>           | cagatataattccattgggc                                                        | cacgTTTTctgttcggccac                                                            | <i>gacgagcaaataattaccttc</i> |
| <i>tbc-12 prom3</i>           | gttaacaaggccccgTTgTg                                                        | gctatTTTctgaagctcac                                                             | <i>ggaaattgaccacacaaatgg</i> |
| <i>tbc-12 prom4</i>           | caaaccagttgCGTgaatgcc                                                       | gtggccatttaacgcaattc                                                            | <i>ctaggggctTTtaagtacttg</i> |
| <i>pgp-4 prom1</i>            | gaggacataatttagccgc                                                         | gtgagcaacaaccattttg                                                             | ctctgctaacaatggTtctg         |
| <i>pgp-4 prom2</i>            | ctgacctaaaaagacaacgTc                                                       | gcacacactacaactaccg                                                             | ctggcaattttcattgggacc        |
| <i>haf-7 prom1</i>            | gctatattttcatcgTggc                                                         | gttcacacacattattgctc                                                            | caggaaatgcaacaatatgc         |
| <i>haf-7 prom2</i>            | gggaaagccctgaaatctga                                                        | ggatttttattccaaccctc                                                            | gtgcacctagcaatttcatgc        |
| <b>FOSMID RECOMBINEERING</b>  |                                                                             |                                                                                 |                              |
| <b>Fosmid clone (gene)</b>    | <b>Primer F</b>                                                             | <b>Primer R</b>                                                                 |                              |
| WRM0641dF02 ( <i>gly-18</i> ) | cacgaggtcttgccatgccacaactgacacataa<br>aaattggattttatgagctgtctcatcctactttcac | aacgttgacccaaaaaatgaaccgaaatgaa<br>aaaatgtactgaaaaaactactgtctggaagtgt<br>acttgg |                              |
| WRM065dE01 ( <i>gpx-8</i> )   | acgataagggaaaactatatcaagtgaactttatt<br>tattcagagataagctgtctcatcctactttcac   | atctaaaacttatgtaaagtctaaaactgtatatat<br>gttgactaccacactactgtctggaagtgtacttgg    |                              |
